# Supplementary material
Source: PubMed Central journal article supplement (PMC5446786)
Supplement: NIHMS71913-supplement-Reporting_Checklist.pdf [file NIHMS71913-supplement-Reporting_Checklist.pdf]

Corresponding Author: György Buzsáki

Manuscript Number: NN-A57560

Manuscript Type: Article

# Main Figures: 6

# Supplementary Figures: 15

# Supplementary Tables: 1

# Supplementary Videos: 0

## Reporting Checklist for Nature Neuroscience

This checklist is used to ensure good reporting standards and to improve the reproducibility of published results. For more information, please read [Reporting Life Sciences Research](#).

Please note that in the event of publication, it is mandatory that authors include all relevant methodological and statistical information in the manuscript.

### ► Statistics reporting, by figure

- Please specify the following information for each panel reporting quantitative data, and where each item is reported (section, e.g. Results, & paragraph number).
- Each figure legend should ideally contain an exact sample size (n) for each experimental group/condition, where n is an exact number and not a range, a clear definition of how n is defined (for example x cells from x slices from x animals from x litters, collected over x days), a description of the statistical test used, the results of the tests, any descriptive statistics and clearly defined error bars if applicable.
- For any experiments using custom statistics, please indicate the test used and stats obtained for each experiment.
- Each figure legend should include a statement of how many times the experiment shown was replicated in the lab; the details of sample collection should be sufficiently clear so that the replicability of the experiment is obvious to the reader.
- For experiments reported in the text but not in the figures, please use the paragraph number instead of the figure number.

**Note:** Mean and standard deviation are not appropriate on small samples, and plotting independent data points is usually more informative. When technical replicates are reported, error and significance measures reflect the experimental variability and not the variability of the biological process; it is misleading not to state this clearly.

| FIGURE NUMBER           | TEST USED       |                       | n            |                                    |                       | DESCRIPTIVE STATS (AVERAGE, VARIANCE) |                       | P VALUE     |                       | DEGREES OF FREEDOM & F/t/z/R/ETC VALUE |                       |
|-------------------------|-----------------|-----------------------|--------------|------------------------------------|-----------------------|---------------------------------------|-----------------------|-------------|-----------------------|----------------------------------------|-----------------------|
|                         | WHICH TEST?     | SECTION & PARAGRAPH # | EXACT VALUE  | DEFINED?                           | SECTION & PARAGRAPH # | REPORTED?                             | SECTION & PARAGRAPH # | EXACT VALUE | SECTION & PARAGRAPH # | VALUE                                  | SECTION & PARAGRAPH # |
| example 1a              | one-way ANOVA   | Fig. legend           | 9, 9, 10, 15 | mice from at least 3 litters/group | Methods para 8        | error bars are mean +/- SEM           | Fig. legend           | p = 0.044   | Fig. legend           | F(3, 36) = 2.97                        | Fig. legend           |
| example results, para 6 | unpaired t-test | Results para 6        | 15           | slices from 10 mice                | Results para 6        | error bars are mean +/- SEM           | Results para 6        | p = 0.0006  | Results para 6        | t(28) = 2.808                          | Results para 6        |

|               |             | TEST USED                                                                             |                                | n            |                                        |                                                                                          | DESCRIPTIVE STATS (AVERAGE, VARIANCE)                                                        |                      | P VALUE                                                                                                                                                                 |                                | DEGREES OF FREEDOM & F/t/z/R/ETC VALUE |  |
|---------------|-------------|---------------------------------------------------------------------------------------|--------------------------------|--------------|----------------------------------------|------------------------------------------------------------------------------------------|----------------------------------------------------------------------------------------------|----------------------|-------------------------------------------------------------------------------------------------------------------------------------------------------------------------|--------------------------------|----------------------------------------|--|
| FIGURE NUMBER | WHICH TEST? | SECTION & PARAGRAPH #                                                                 | EXACT VALUE                    | DEFINED?     | SECTION & PARAGRAPH #                  | REPORTED?                                                                                | SECTION & PARAGRAPH #                                                                        | EXACT VALUE          | SECTION & PARAGRAPH #                                                                                                                                                   | VALUE                          | SECTION & PARAGRAPH #                  |  |
| +<br>-        | 1d          | Wilcoxon signed rank test, two-sided                                                  | Fig. legend and Results para 1 | 29           | sessions in 5 mice                     | Fig. legend and Results para 1                                                           | error bars are mean +/- SEM; raw values are shown with superimposed grey lines               | Fig. legend, Fig. 1d | P = 0.0006                                                                                                                                                              | Fig. legend and Results para 1 | Z = -3.43                              |  |
| +<br>-        | 2c          | Kruskal Wallis one-way analysis of variance followed by Tukey's post-hoc tests        | Fig. legend                    | 531          | place cells                            | Fig. legend; # of cells for each distance point is shown on the graph                    | Boxplots showing median and data dispersion (min and max values)                             | Fig. legend, Fig. 2c | P = 2.4e-64; post hoc tests P<0.001 for all comparisons to illuminated shank; P>0.05 for the others                                                                     | Fig. legend                    | chi-square = 303 df = 530              |  |
| +<br>-        | 2g          | Kruskal Wallis test followed by Tukey's post-hoc tests                                | Fig. legend                    | 283, 81, 167 | control, delayed, silenced place cells | Fig. legend                                                                              | Boxplots showing median and data dispersion (min and max values)                             | Fig. legend, Fig. 2h | P = 2.6e-78                                                                                                                                                             | Fig. legend                    | chi-square = 357.3 df = 530            |  |
| +<br>-        | 3d          | Kruskal Wallis test followed by Tukey's post-hoc tests                                | Fig. legend and Results para 3 | 283, 81, 167 | control, delayed, silenced place cells | Fig. legend                                                                              | Cumulative distribution                                                                      | Results              | Kruskal Wallis: P = 0.002; post-hoc tests: silenced vs control: P = 0.008; delayed vs control: P = 0.62; silenced vs delayed: P = 0.007                                 | Fig. legend and Results        | chi-square = 12.35 df = 530            |  |
| +<br>-        | 3e          | Chi square test followed by two-sided Fisher's exact tests with Bonferroni correction | Fig. legend and Results para 3 | 283, 81, 167 | control, delayed, silenced place cells | # of cells with or without overlapping place fields also shown in Fig. 3e and in Results | Proportions from contingency data with raw # of cells in each group displayed in the figure  | Fig. 3e              | chi square test on the 3 groups: P = 5.8e-4; post-hoc Fisher's exact tests: P = 0.004 (control vs silenced); P = 0.04 (delayed vs silenced); P = 1 (control vs delayed) | Fig. legend and Results        | chi-square = 11.85 df = 2              |  |
| +<br>-        | 4a          | Wilcoxon signed rank test, two-sided                                                  | Fig. legend and Results para 6 | 283          | control place cells                    | Fig. legend and Results                                                                  | Full distribution is shown in dot plot (except one outlier included in statistical analysis) | Fig. 4a legend       | P = 0.007                                                                                                                                                               | Fig. legend and Results        | Z = -2.70                              |  |
| +<br>-        | 4b          | Wilcoxon signed rank test, two-sided                                                  | Fig. legend                    | 81           | delayed silenced place cells           | Fig. legend                                                                              | Full distribution is shown in dot plot                                                       | Fig. 4b legend       | P = 0.13                                                                                                                                                                | Fig. legend                    | Z = -1.50                              |  |

|        |          |                                                         |                                |               |                                                                                                 |                         |                                                                                                       |                     |                                                                                                                                        |                         |                                                                              |  |
|--------|----------|---------------------------------------------------------|--------------------------------|---------------|-------------------------------------------------------------------------------------------------|-------------------------|-------------------------------------------------------------------------------------------------------|---------------------|----------------------------------------------------------------------------------------------------------------------------------------|-------------------------|------------------------------------------------------------------------------|--|
| +<br>- | 4c       | Wilcoxon signed rank test, two-sided                    | Fig. legend and Results para 6 | 167           | silenced place cells                                                                            | Fig. legend and Results | Full distribution is shown in dot plot (except one outlier included in statistical analysis)          | Fig. 4c legend      | P = 0.86                                                                                                                               | Fig. legend and Results | Z = -0.17                                                                    |  |
| +<br>- | 5e       | Kruskall Wallis test followed by Tukey's post-hoc tests | Fig. legend and Results para 7 | 24, 6, 16     | ensembles of control, delayed and silenced place cells                                          | Fig. legend and Results | Full distribution is shown in dot plot; superimposed bars represent mean +/- SEM                      | Fig. 5e, Results    | Kruskall Wallis: P = 0.009; Post-hoc tests: silenced vs control: P = 0.01; delayed vs control: P = 0.94; silenced vs delayed: P = 0.07 | Fig. legend and Results | chi-square = 0.009<br>df = 45                                                |  |
| +<br>- | 6b       | Wilcoxon signed rank test, two-sided                    | Fig. legend and Results para 8 | 6, 15         | Pairs of simultaneously recorded control-delayed ensembles; pairs of control-silenced ensembles | Fig. legend and Results | error bars are mean +/- SEM; raw values are shown with superimposed grey lines                        | Fig. 6b legend      | P = 0.84 (control-delayed pairs); P = 0.015 (control-silenced pairs)                                                                   | Fig. legend and Results | Ctrl-Silenced pairs: signed rank = 102; Ctrl-delayed pairs: signed rank = 9  |  |
| +<br>- | 6c       | Mann and Whitney U test                                 | Fig. legend and Results para 8 | 6, 15         | Differences values calculated for simultaneously recorded ensembles                             | Fig. legend and Results | Full distribution is shown in dot plot; superimposed bars represent mean +/- SEM                      | Fig. 6c legend      | P = 0.047                                                                                                                              | Fig. legend and Results | Z = -1.99                                                                    |  |
| +<br>- | Supp 5c  | Mann and Whitney U test                                 | Fig. legend                    | 19, 32        | control and silenced pyramidal cells                                                            | Fig. legend             | boxplots showing median and data dispersion (min and max values)                                      | Supp Fig. 3c legend | P = 1.7e-7                                                                                                                             | Fig. legend             | Z = 5.23                                                                     |  |
| +<br>- | Supp 10a | Chi-square test                                         | Fig. legend                    | 460, 129, 273 | control, delayed and silenced pyramidal cells                                                   | Fig. legend             | Proportions from contingency data with raw cell counts in legend                                      | Fig. legend         | P = 0.56                                                                                                                               | Fig. legend             | df = 2<br>chi-square = 1.17                                                  |  |
| +<br>- | Supp 10b | Kruskall Wallis test                                    | Fig. legend                    | 283, 81, 167  | control, delayed, silenced place cells                                                          | Fig. legend             | Cumulative distribution                                                                               | Supp Fig. 4b legend | P = 0.67                                                                                                                               | Fig. legend             | df = 1061<br>chi-square = 3.23                                               |  |
| +<br>- | Supp 10c | Kruskall Wallis test                                    | Fig. legend                    | 283, 81, 167  | control, delayed, silenced place cells                                                          | Fig. legend             | Cumulative distribution                                                                               | Supp Fig. 4c legend | P = 0.41                                                                                                                               | Fig. legend             | df = 1061<br>chi-square = 5.08                                               |  |
| +<br>- | Supp 10d | Chi-square tests                                        | Fig. legend                    | 460, 129, 273 | control, delayed and silenced pyramidal cells                                                   | Fig. legend             | Proportions from contingency data combined for all recorded cells in each group per exploration epoch | Supp Fig. 4d        | P = 0.84 (control); P = 0.90 (delayed); P = 0.61 (silenced)                                                                            | Fig. legend             | df = 1; chi2 = 0.04 (control); chi2 = 0.02 (delayed); chi2 = 0.27 (silenced) |  |
| +<br>- | Supp 10e | Chi-square test                                         | Fig. legend                    | 276, 79, 149  | place cells in pre-exploration epoch from control, delayed and silenced groups                  | Fig. legend             | Proportions from contingency data combined for all recorded cells in the 3 groups                     | Supp Fig. 4e        | P = 0.76                                                                                                                               | Fig. legend             | df = 2<br>chi-square = 0.56                                                  |  |
| +<br>- | Supp 10f | Chi-square test                                         | Fig. legend                    | 273, 80, 155  | place cells in post-exploration epoch from control, delayed and silenced groups                 | Fig. legend             | Proportions from contingency data combined for all recorded cells in the 3 groups                     | Supp Fig. 4f        | P = 0.13                                                                                                                               | Fig. legend             | df = 2<br>chi-square = 4.02                                                  |  |
| +<br>- | Supp 12a | Wilcoxon signed rank test, two-sided                    | Fig. legend                    | 6             | pairs of control-delayed ensembles                                                              | Fig. legend             | error bars are mean +/- SEM; raw values are shown with superimposed grey lines                        | Supp Fig. 6a legend | P = 0.84                                                                                                                               | Fig. legend             | signed rank = 10                                                             |  |

|        |             |                                                |                                  |          |                                                                                                |                                  |                                                                                                                                     |                           |                                                              |                                  |                                                                                     |                |
|--------|-------------|------------------------------------------------|----------------------------------|----------|------------------------------------------------------------------------------------------------|----------------------------------|-------------------------------------------------------------------------------------------------------------------------------------|---------------------------|--------------------------------------------------------------|----------------------------------|-------------------------------------------------------------------------------------|----------------|
| +<br>- | Supp<br>12b | Wilcoxon<br>signed rank<br>test, two-<br>sided | Fig.<br>legend                   | 15       | pairs of control-<br>silenced ensembles                                                        | Fig.<br>legend                   | error bars are<br>mean +/- SEM;<br>raw values are<br>shown with<br>superimposed<br>grey lines                                       | Supp<br>Fig. 6b<br>legend | P = 0.02                                                     | Fig.<br>legend                   | signed rank = 100                                                                   |                |
| +<br>- | Supp<br>12c | Mann-<br>Whitney U<br>test                     | Fig.<br>legend                   | 6, 15    | Difference values<br>computed for pairs<br>of ensembles                                        | Fig.<br>legend                   | Full distribution is<br>shown in dot plot;<br>superimposed<br>bars represent<br>mean +/- SEM                                        | Supp<br>Fig. 6c<br>legend | P = 0.047                                                    | Fig.<br>legend                   | Z = -1.99                                                                           |                |
| +<br>- | Supp<br>9a  | Mann-<br>Whitney U<br>test                     | Fig.<br>legend                   | 240, 377 | "ripple-delayed"<br>and "ripple-locked"<br>place cells with<br>identifiable light-<br>response | Fig.<br>legend                   | Boxplots showing<br>median and data<br>dispersion (min<br>and max values)                                                           | Fig.<br>legend            | P = 0.07                                                     | Fig.<br>legend                   | Z = -1.83                                                                           |                |
| +<br>- | Supp<br>9b  | Chi-square<br>test                             | Fig.<br>legend                   | 369, 601 | "ripple-delayed"<br>and "ripple-locked"<br>PYR cells                                           | Fig.<br>legend                   | Contingency data<br>with raw cell<br>counts in legend                                                                               | Fig.<br>legend            | P = 0.22                                                     | Fig.<br>legend                   | chi-square = 1.54<br>df = 1                                                         |                |
| +<br>- | Supp<br>9c  | Kruskall<br>Wallis test                        | Fig.<br>legend                   | 247, 385 | "ripple-delayed"<br>and "ripple-locked"<br>place cells                                         | Fig.<br>legend                   | Cumulative<br>distribution                                                                                                          | Fig.<br>legend            | P = 0.92                                                     | Fig.<br>legend                   | df = 1263<br>chi-square = 0.49                                                      |                |
| +<br>- | Supp<br>9d  | Kruskall<br>Wallis test                        | Fig.<br>legend                   | 247, 385 | "ripple-delayed"<br>and "ripple-locked"<br>place cells                                         | Fig.<br>legend                   | Cumulative<br>distribution                                                                                                          | Fig.<br>legend            | P = 0.59                                                     | Fig.<br>legend                   | df = 1263<br>chi-square = 1.9                                                       |                |
| +<br>- | Supp<br>9e  | Chi-square<br>tests                            | Fig.<br>legend                   | 369, 601 | "ripple-delayed"<br>and "ripple-locked"<br>PYR cells                                           | Fig.<br>legend                   | Contingency data                                                                                                                    |                           | P = 0.64<br>(delayed);<br>P = 0.86<br>(locked)               | Fig.<br>legend                   | delayed: chi-<br>square = 0.21 ,df<br>= 1; locked: chi-<br>square = 0.03, df<br>= 1 |                |
| +<br>- | Supp<br>9f  | Wilcoxon<br>signed rank<br>test, two-<br>sided | Fig.<br>legend                   | 247      | "ripple-delayed"<br>place cells                                                                | Fig.<br>legend                   | Full distribution is<br>shown in dot plot<br>(except one<br>outlier included in<br>statistical analysis)                            |                           | P = 6.6e-5                                                   | Fig.<br>legend                   | Z = -3.99                                                                           |                |
| +<br>- | Supp<br>9g  | Wilcoxon<br>signed rank<br>test, two-<br>sided | Fig.<br>legend                   | 385      | "ripple-locked"<br>place cells                                                                 | Fig.<br>legend                   | Full distribution is<br>shown in dot plot<br>(except two<br>outliers included<br>in statistical<br>analysis)                        |                           | P = 0.49                                                     | Fig.<br>legend                   | Z = -0.69                                                                           |                |
| +<br>- | Supp<br>9h  | Mann-<br>Whitney U<br>test                     | Fig.<br>legend<br>and<br>Results | 247, 385 | "ripple-delayed"<br>and "ripple-locked"<br>place cells                                         | Fig.<br>legend<br>and<br>Results | Cumulative curve                                                                                                                    | Fig.<br>legend            | P = 0.007                                                    | Fig.<br>legend<br>and<br>Results | Z = 2.71                                                                            |                |
| +<br>- | Supp<br>9i  | Pearson's<br>test                              | Fig.<br>legend                   | 240, 377 | "ripple-delayed"<br>and "ripple-locked"<br>place cells with<br>identifiable light-<br>response | Fig.<br>legend                   | Full distributions<br>are shown in dot<br>plots                                                                                     | Supp.<br>Fig. 7i          | P = 0.2 for<br>ripple-locked<br>and ripple-<br>delayed units | Fig.<br>legend                   | R = -0.09<br>(delayed) and R =<br>0.07 (locked)                                     | Fig.<br>legend |
| +<br>- | Supp<br>9j  | Chi-square<br>test                             | Fig.<br>legend                   | 247, 385 | "ripple-delayed"<br>and "ripple-locked"<br>place cells                                         | Fig.<br>legend                   | Contingency data<br>combined for all<br>recorded cells in<br>the 3 groups: raw<br>number of cells in<br>each group in the<br>figure | Supp.<br>Fig. 7j          | P = 0.07                                                     | Fig.<br>legend                   | chi-square = 3.21<br>df = 1                                                         |                |
| +<br>- | Supp<br>9k  | Mann-<br>Whitney U<br>test                     | Fig.<br>legend                   | 74, 166  | "ripple-delayed"<br>place cells (no ov,<br>ov) - identifiable<br>light response                | Fig.<br>legend                   | Boxplots showing<br>median and data<br>dispersion (min<br>and max values)                                                           | Fig.<br>legend            | P = 0.58                                                     | Fig.<br>legend                   | Z = 0.55                                                                            |                |
| +<br>- | Supp<br>9l  | Mann-<br>Whitney U<br>test                     | Fig.<br>legend                   | 140, 237 | "ripple-locked"<br>place cells (no ov,<br>ov) - identifiable<br>light response                 | Fig.<br>legend                   | Boxplots showing<br>median and data<br>dispersion (min<br>and max values)                                                           | Fig.<br>legend            | P = 0.005                                                    | Fig.<br>legend                   | Z = -2.76                                                                           |                |

|        |             |                                                |             |                   |                                                               |                         |                                                                                                                   |                           |                                                             |                         |                                                                |  |
|--------|-------------|------------------------------------------------|-------------|-------------------|---------------------------------------------------------------|-------------------------|-------------------------------------------------------------------------------------------------------------------|---------------------------|-------------------------------------------------------------|-------------------------|----------------------------------------------------------------|--|
| +<br>- | Supp<br>9o  | Mann-Whitney U test                            | Fig. legend | 12, 19            | "ripple-delayed" and "ripple-locked" ensembles of place cells | Fig. legend and Results | Full distribution is shown in dot plot; superimposed bars represent mean +/- SEM                                  | Fig. legend               | P = 0.009                                                   | Fig. legend and Results | Z = 2.62                                                       |  |
| +<br>- | Supp<br>15a | Kruskall Wallis test                           | Fig. legend | 283, 81, 167      | control, delayed, silenced place cells                        | Fig. legend             | Full distribution is shown in dot plot                                                                            | Supp. Fig. 8a             | P = 0.02                                                    | Fig. legend             | df = 1061<br>chi-square = 14.05                                |  |
| +<br>- | Supp<br>15b | Kruskall Wallis test                           | Fig. legend | 272, 80, 153      | control place cells with place fields both in pre and post    | Fig. legend             | Full distribution is shown in dot plots                                                                           | Supp. Fig. 8b legend      | P = 0.09 (i)<br>P = 0.07 (ii)<br>P = 0.08 (iii)             | Fig. legend             | df = 1035,<br>chi-square = 9.98(i); 10.85(ii), 10.74(iii)      |  |
| +<br>- | Supp<br>7a  | Wilcoxon signed-rank                           | Fig. legend | 7 sessions        | sessions with ripple-delayed paradigms only                   | Fig. legend             | All individual data points are shown with blue lines                                                              | Supp. Fig. 9a legend      | P = 0.05                                                    | Fig. legend             | signed rank = 2                                                |  |
| +<br>- | Supp<br>7b  | Wilcoxon signed-rank                           | Fig. legend | 13 sessions       | sessions with ripple-locked paradigms only                    | Fig. legend             | All individual data points are shown with green lines                                                             | Supp. Fig. 9b legend      | P = 0.08                                                    | Fig. legend             | signed rank = 20                                               |  |
| +<br>- | Supp<br>7d  | Mann-Whitney U test                            | Fig. legend | 7, 13             | sessions with ripple-delayed or locked paradigms              | Fig. legend             | All individual data points are shown                                                                              | Supp. Fig. 9d             | P = 0.70                                                    | Fig. legend             | Z = 0.40                                                       |  |
| +<br>- | Supp<br>7e  | Mann-Whitney U test with Bonferroni correction | Fig. legend | 7,13              | sessions with ripple-delayed or locked paradigms              | Fig. legend             | Lines with shaded areas show mean ± SEM                                                                           |                           | P>0.5 for all trials                                        | Fig. legend             |                                                                |  |
| +<br>- | Supp<br>4   | Pearson's test                                 | Fig. legend | 81, 167           | delayed and silenced place cells                              | Fig. legend             | Full distributions are shown in dot plots                                                                         | Supp. Fig. 11             | P = 0.70 (delayed) and 1.16e-05 (silenced)                  | Fig. and fig legend     | r = 0.04 (delayed) and 0.34 (silenced)                         |  |
| +<br>- | Supp<br>11a | Kruskall Wallis test                           | Fig. legend | 283, 81, 167      | control, delayed, silenced place cells                        | Fig. legend             | Boxplots showing median and data dispersion (min and max values)                                                  |                           | P = 0.90                                                    | Fig. and fig legend     | df = 530,<br>chi-square = 11.52                                |  |
| +<br>- | Supp<br>11b | Kruskall Wallis test                           | Fig. legend | 283, 81, 167      | control, delayed, silenced place cells                        | Fig. legend             | Boxplots showing median and data dispersion (min and max values)                                                  |                           | P = 0.17                                                    | Fig. and legend         | df = 530,<br>chi-square = 3.53                                 |  |
| +<br>- | Supp<br>11c | Pearson's tests                                | Fig. legend | 531, 283, 81, 167 | all, control, delayed, silenced place cells                   | Fig. legend             | Full distributions are shown in dot plots                                                                         | Supp. Fig. 12c and legend | P = 0.16(all), 0.85(control), 0.17(delayed), 0.05(silenced) | Fig. and legend         | r = -0.06(all), 0.01(control), -0.15(delayed), -0.15(silenced) |  |
| +<br>- | Supp<br>11d | Pearson's tests                                | Fig. legend | 531, 283, 81, 167 | all, control, delayed, silenced place cells                   | Fig. legend             | Full distributions are shown in dot plots                                                                         | Supp. Fig. 12d and legend | P = 0.91(all), 0.99(control), 0.86(delayed), 0.51(silenced) | Fig. and legend         | r = 0(all), 0(control), -0.02(delayed), 0.05(silenced)         |  |
| +<br>- | Supp<br>2a  | Kruskall Wallis test                           | Fig. legend | 264, 81, 135      | control, delayed, silenced place cells                        | Fig. legend             | Cumulative curve                                                                                                  |                           | P = 0.01                                                    | Fig. and fig legend     | df = 479,<br>chi-square = 8.41                                 |  |
| +<br>- | Supp<br>2b  | Chi-square test                                | Fig. legend | 264, 81, 135      | control, delayed, silenced place cells                        | Fig. and legend         | Contingency data combined for all recorded cells in the 3 groups: raw number of cells in each group in the figure | Supp. Fig. 13b            | P = 0.002                                                   | Fig. legend             | chi-square = 9.31, df = 2                                      |  |
| +<br>- | Supp<br>2c  | Wilcoxon signed-rank                           | Fig. legend | 264               | control place cells                                           | Fig. legend             | Full distributions are shown in dot plots                                                                         | Supp. Fig. 13c            | P = 0.009                                                   | Fig. and legend         | signed rank = 14242                                            |  |
| +<br>- | Supp<br>2d  | Wilcoxon signed-rank                           | Fig. legend | 81                | delayed place cells                                           | Fig. legend             | Full distributions are shown in dot plots                                                                         | Supp. Fig. 13d            | P = 0.13                                                    | Fig. and legend         | signed rank = 1341                                             |  |
| +<br>- | Supp<br>2e  | Wilcoxon signed-rank                           | Fig. legend | 135               | silenced place cells                                          | Fig. legend             | Full distributions are shown in dot plots                                                                         | Supp. Fig. 13e            | P = 0.91                                                    | Fig. and legend         | signed rank = 4539                                             |  |

|   |          |                                                 |             |                       |                                                                                                                                       |                 |                                                                                                                   |                |                                                                     |                     |                                                                                    |  |
|---|----------|-------------------------------------------------|-------------|-----------------------|---------------------------------------------------------------------------------------------------------------------------------------|-----------------|-------------------------------------------------------------------------------------------------------------------|----------------|---------------------------------------------------------------------|---------------------|------------------------------------------------------------------------------------|--|
| + | Supp 2f  | Kruskall Wallis test                            | Fig. legend | 21, 6, 13             | ensembles of control, delayed, silenced place cells                                                                                   | Fig. legend     | All individual data points are shown                                                                              |                | P = 0.024                                                           | Fig. and legend     | df = 39, chi-square = 7.46                                                         |  |
| + | Supp 2g  | Mann-Whitney U test                             | Fig. legend | 6, 12                 | pairs of control-delayed ensembles, pairs of control-silenced ensembles                                                               | Fig. legend     | All individual data points are shown                                                                              | Supp. Fig. 13g | P = 0.03                                                            | Fig. and legend     | ranksum: 91                                                                        |  |
| + | Supp 13a | Mann-Whitney U test with Bonferroni correction  | Fig. legend | 10, 29                | sessions with cued or non-cued versions of the task                                                                                   | Fig. legend     | Lines with shaded areas show mean $\pm$ SEM                                                                       |                | P < 0.05 for trials marked with black dot                           | Fig. and legend     |                                                                                    |  |
| + | Supp 13b | Kruskall Wallis test and Tukey's post-hoc tests | Fig. legend | 121, 72, 283, 167, 81 | control place cells in cued version, silenced in cued version, control in non-cued version, silenced in non-cued, delayed in non-cued | Fig. and legend | Cumulative distributions for the 5 groups                                                                         |                | P = 7.89e-06                                                        | Fig, and legend     | df = 723, chi-square = 28.98                                                       |  |
| + | Supp 11e | Pearson's tests                                 | Fig. legend | 283, 81, 167          | control, delayed, silenced place cells                                                                                                | Fig. legend     | Full distributions are shown in dot plots                                                                         | Supp. Fig. 15  | P = 0.41 (control), 0.57 (delayed), 0.42 (silenced)                 | Fig and fig. legend | r = -0.05 (control), -0.06 (delayed and silenced)                                  |  |
| + | Supp 17a | Kruskall Wallis tests                           | Fig. legend | 257, 161, 79          | control, delayed and silenced place cells recorded during sleep                                                                       | Fig. legend     | Boxplots showing median and data dispersion (min and max values)                                                  |                | P = 0.73 (rates), 0.66 (participation), 0.79 (counts), 0.66 (gains) | Fig and legend      | df = 496; chi-square = 0.65(rates), 0.83(participation), 0.46(counts), 0.82(gains) |  |
| + | Supp 14b | Pearson's test                                  | Fig. legend | 497                   | place cells from 3 groups                                                                                                             | Fig. legend     | Full distributions are shown in dot plots                                                                         |                | P = 0.36                                                            | Fig and legend      | r = -0.04                                                                          |  |
| + | Supp 14c | Pearson's test                                  | Fig. legend | 497                   | place cells from 3 groups                                                                                                             | Fig. legend     | Full distributions are shown in dot plots                                                                         |                | P = 0.35                                                            | Fig and legend      | r = -0.04                                                                          |  |
| + | Supp 14d | Pearson's test                                  | Fig. legend | 497                   | place cells from 3 groups                                                                                                             | Fig. legend     | Full distributions are shown in dot plots                                                                         |                | P = 0.39                                                            | Fig and legend      | r = -0.04                                                                          |  |
| + | Supp 14e | Pearson's test                                  | Fig. legend | 497                   | place cells from 3 groups                                                                                                             | Fig. legend     | Full distributions are shown in dot plots                                                                         |                | P = 0.32                                                            | Fig and legend      | r = -0.04                                                                          |  |
| + | Supp 8a  | Chi-square test                                 | Fig. legend | 283, 81, 167          | control, delayed, silenced place cells                                                                                                | Fig. legend     | Contingency data combined for all recorded cells in the 3 groups: raw number of cells in each group in the figure |                | P = 0.001                                                           | Fig. legend         | chi-square = 10.31, df = 2                                                         |  |
| + | Supp 8b  | Chi-square test                                 | Fig. legend | 283, 81, 167          | control, delayed, silenced place cells                                                                                                | Fig. legend     | Contingency data combined for all recorded cells in the 3 groups: raw number of cells in each group in the figure |                | P = 0.002                                                           | Fig. legend         | chi-square = 9.93, df = 2                                                          |  |
| + | Supp 7c  | Wilcoxon signed rank test, two-sided            | Fig. legend | 29                    | sessions in 5 mice                                                                                                                    | Fig. legend     | error bars are mean $\pm$ SEM; raw values are shown with superimposed lines                                       |                | P = 0.0006                                                          | Fig and Fig. legend | Z = -3.43                                                                          |  |
| + | Supp 2a  | Kruskall Wallis test                            | Fig. legend | 264, 81, 135          | control, delayed, silenced place cells from CamKII-cre::Arch mice only                                                                | Fig. legend     | Cumulative curve                                                                                                  |                | P = 0.01                                                            | Fig. and fig legend | df = 479, chi-square = 8.41                                                        |  |

## ► Representative figures

1. Are any representative images shown (including Western blots and immunohistochemistry/staining) in the paper?

If so, what figure(s)?

Fig. 2e  
Fig. 3a-c  
Fig. 5b  
Fig. 6a

2. For each representative image, is there a clear statement of how many times this experiment was successfully repeated and a discussion of any limitations in repeatability?

If so, where is this reported (section, paragraph #)?

The representative images are presented for illustration purposes, not as final evidence. The corresponding statistics for group data are included in the same figures.

## ► Statistics and general methods

1. Is there a justification of the sample size?

If so, how was it justified?

Where (section, paragraph #)?

Even if no sample size calculation was performed, authors should report why the sample size is adequate to measure their effect size.

No statistical methods were used to pre-determine sample sizes, but our sample sizes are similar to those generally employed in the field.

This information is stated in the "online Methods" section, paragraph entitled "Statistical analyses".

2. Are statistical tests justified as appropriate for every figure?

Where (section, paragraph #)?

Yes

- a. If there is a section summarizing the statistical methods in the methods, is the statistical test for each experiment clearly defined?

This information is stated in the "online Methods" section, paragraph entitled "Statistical Analyses".

- b. Do the data meet the assumptions of the specific statistical test you chose (e.g. normality for a parametric test)?

Where is this described (section, paragraph #)?

Our data did not follow normal distributions, therefore non parametric tests were used (see online Methods, "Statistical Analyses" section).

- c. Is there any estimate of variance within each group of data?

Is the variance similar between groups that are being statistically compared?

Where is this described (section, paragraph #)?

All tests are non-parametric

- d. Are tests specified as one- or two-sided?

Yes. All tests are two-sided unless indicated, as stated in the online Methods ("Statistical Analyses" section). One-sided Wilcoxon signed rank tests are only used to assess whether the cell is suppressed or activated by the light stimuli.

- e. Are there adjustments for multiple comparisons?

Yes. Tukey's post-hoc tests are used following Kruskal Wallis tests (Fig. 2c; 2h; 3d; 5e) and Bonferroni correction is applied following chi square tests (Fig. 3e).

3. To promote transparency, *Nature Neuroscience* has stopped allowing bar graphs to report statistics in the papers it publishes. If you have bar graphs in your paper, please make sure to switch them to dot-plots (with central and dispersion statistics displayed) or to box-and-whisker plots to show data distributions.
- We used cumulative distributions, dot plots or box plots (with central and dispersion statistics) in our figures. Bar plots are only used in combination with the complete distribution of the values (grey lines superimposed).
4. Are criteria for excluding data points reported?  
Was this criterion established prior to data collection?  
Where is this described (section, paragraph #)?
- Outlier data points are not displayed in Figure 4a and 4c and Supplementary Figure 7f and 7g but these data are included in the statistical analyses. Excluding the outlier values does not impact the conclusions. This information is reported in the corresponding figure legends and in the online Methods section ("Statistical analyses").
5. Define the method of randomization used to assign subjects (or samples) to the experimental groups and to collect and process data.  
If no randomization was used, state so.  
Where does this appear (section, paragraph #)?
- As presented in Supplementary Table 1, the two different types of stimulations ("delayed" or "locked" relative to SPW-R detection) were used in the same animal subjects, either in different recording sessions or in combination. Each paradigm was used in a pseudo-randomized manner (as stated in the online Methods).
6. Is a statement of the extent to which investigator knew the group allocation during the experiment and in assessing outcome included?  
If no blinding was done, state so.  
Where (section, paragraph #)?
- Analysis of place cells properties (remapping, place field characteristics) was done blindly relative to the cell categories these cells belonged to (control, delayed and silenced groups - approach 1 - or ripple-locked or ripple-delayed groups -approach 2-). This is stated in the online Methods ("Statistical analyses" section).
7. For experiments in live vertebrates, is a statement of compliance with ethical guidelines/regulations included?  
Where (section, paragraph #)?
- Yes. All experiments were approved by the Institutional Animal Care and Use Committee of New York University Medical Center.  
  
This information is reported in the online Methods section, paragraph "Subjects and electrode implantation"
8. Is the species of the animals used reported?  
Where (section, paragraph #)?
- Yes. As reported in the main text and in the online Methods ("Subjects and electrode implantation") sections, mice were used for this study.
9. Is the strain of the animals (including background strains of KO/transgenic animals used) reported?  
Where (section, paragraph #)?
- Yes. This information is reported in the online Methods section, paragraph "Subjects and electrode implantation"
10. Is the sex of the animals/subjects used reported?  
Where (section, paragraph #)?
- Yes. This information is reported in the online Methods section, paragraph "Subjects and electrode implantation"
11. Is the age of the animals/subjects reported?  
Where (section, paragraph #)?
- "3-5 months old".  
This information is reported in the online Methods section, paragraph "Subjects and electrode implantation"
12. For animals housed in a vivarium, is the light/dark cycle reported?  
Where (section, paragraph #)?
- "All mice were [...] maintained on a 12h:12h light-dark cycle (lights on at 07:00 a.m.)". This information is reported in the online Methods section, paragraph "Pre-training"



13. For animals housed in a vivarium, is the housing group (i.e. number of animals per cage) reported?  
Where (section, paragraph #)?
- "Maximum 5 adult mice per cage; housed individually after surgery". This information is reported in the online Methods section, paragraph "Pre-training".
14. For behavioral experiments, is the time of day reported (e.g. light or dark cycle)?  
Where (section, paragraph #)?
- "All experiments were done during the day (light-cycle)". This information is reported in the online Methods section, paragraph "Pre-training"
15. Is the previous history of the animals/subjects (e.g. prior drug administration, surgery, behavioral testing) reported?  
Where (section, paragraph #)?
- "All mice were free from prior manipulation before being included in this study". This information is reported in the online Methods section, paragraph "Pre-training"
- a. If multiple behavioral tests were conducted in the same group of animals, is this reported?  
Where (section, paragraph #)?
- N/A
16. If any animals/subjects were excluded from analysis, is this reported?  
Where (section, paragraph #)?
- No animal was excluded from the analyses.
- a. How were the criteria for exclusion defined?  
Where is this described (section, paragraph #)?
- N/A
- b. Specify reasons for any discrepancy between the number of animals at the beginning and end of the study.  
Where is this described (section, paragraph #)?
- N/A

## ▶ Reagents

1. Have antibodies been validated for use in the system under study (assay and species)?
- N/A
- a. Is antibody catalog number given?  
Where does this appear (section, paragraph #)?
- N/A
- b. Where were the validation data reported (citation, supplementary information, Antibodypedia)?  
Where does this appear (section, paragraph #)?
- N/A
2. Cell line identity
- a. Are any cell lines used in this paper listed in the database of commonly misidentified cell lines maintained by [ICLAC](#) and [NCBI Biosample](#)?  
Where (section, paragraph #)?
- N/A

- b. If yes, include in the Methods section a scientific justification of their use--indicate here in which section and paragraph the justification can be found.

N/A

- c. For each cell line, include in the Methods section a statement that specifies:
- the source of the cell lines
  - have the cell lines been authenticated? If so, by which method?
  - have the cell lines been tested for mycoplasma contamination?

Where (section, paragraph #)?

N/A

## ► Data availability

Provide a Data availability statement in the Methods section under "Data availability", which should include, where applicable:

- Accession codes for deposited data
- Other unique identifiers (such as DOIs and hyperlinks for any other datasets)
- At a minimum, a statement confirming that all relevant data are available from the authors
- Formal citations of datasets that are assigned DOIs
- A statement regarding data available in the manuscript as source data
- A statement regarding data available with restrictions

See our [data availability and data citations policy page](#) for more information.

Data deposition in a public repository is mandatory for:

- a. Protein, DNA and RNA sequences
- b. Macromolecular structures
- c. Crystallographic data for small molecules
- d. Microarray data

Deposition is strongly recommended for many other datasets for which structured public repositories exist; more details on our data policy are available [here](#). We encourage the provision of other source data in supplementary information or in unstructured repositories such as [Figshare](#) and [Dryad](#).

We encourage publication of Data Descriptors (see [Scientific Data](#)) to maximize data reuse.

Where is the Data Availability statement provided (section, paragraph #)?

The data that support the findings of this study are available from the corresponding author on request. Our laboratory is a member of the NeuroData Without Borders (NWB) initiative. After publication we routinely make our data publicly available ([CRCNS.org](#)) and this will also be the case for this article.

## ▶ Computer code/software

Any custom algorithm/software that is central to the methods must be supplied by the authors in a usable and readable form for readers at the time of publication. However, referees may ask for this information at any time during the review process.

1. Identify all custom software or scripts that were required to conduct the study and where in the procedures each was used.

2. If computer code was used to generate results that are central to the paper's conclusions, include a statement in the Methods section under "**Code availability**" to indicate whether and how the code can be accessed. Include version information as necessary and any restrictions on availability.

The code that was used to generate results of this study are available from the corresponding author upon request. Multiple analyses were done with the FMAToolbox available in open access to the following address: <http://fmatoolbox.sourceforge.net/>

## ▶ Human subjects

1. Which IRB approved the protocol?

Where is this stated (section, paragraph #)?

N/A

2. Is demographic information on all subjects provided?

Where (section, paragraph #)?

3. Is the number of human subjects, their age and sex clearly defined?

Where (section, paragraph #)?

4. Are the inclusion and exclusion criteria (if any) clearly specified?

Where (section, paragraph #)?

5. How well were the groups matched?

Where is this information described (section, paragraph #)?

6. Is a statement included confirming that informed consent was obtained from all subjects?

Where (section, paragraph #)?

7. For publication of patient photos, is a statement included confirming that consent to publish was obtained?

Where (section, paragraph #)?

## ► fMRI studies

For papers reporting functional imaging (fMRI) results please ensure that these minimal reporting guidelines are met and that all this information is clearly provided in the methods:

1. Were any subjects scanned but then rejected for the analysis after the data was collected? 
  - a. If yes, is the number rejected and reasons for rejection described?  
Where (section, paragraph #)?
2. Is the number of blocks, trials or experimental units per session and/or subjects specified?  
Where (section, paragraph #)?
3. Is the length of each trial and interval between trials specified?
4. Is a blocked, event-related, or mixed design being used? If applicable, please specify the block length or how the event-related or mixed design was optimized.
5. Is the task design clearly described?  
Where (section, paragraph #)?
6. How was behavioral performance measured?
7. Is an ANOVA or factorial design being used?
8. For data acquisition, is a whole brain scan used?  
If not, state area of acquisition. 
  - a. How was this region determined?
9. Is the field strength (in Tesla) of the MRI system stated? 
  - a. Is the pulse sequence type (gradient/spin echo, EPI/spiral) stated?
  - b. Are the field-of-view, matrix size, slice thickness, and TE/TR/flip angle clearly stated?
10. Are the software and specific parameters (model/functions, smoothing kernel size if applicable, etc.) used for data processing and pre-processing clearly stated?

11. Is the coordinate space for the anatomical/functional imaging data clearly defined as subject/native space or standardized stereotaxic space, e.g., original Talairach, MNI305, ICBM152, etc? Where (section, paragraph #)?
12. If there was data normalization/standardization to a specific space template, are the type of transformation (linear vs. nonlinear) used and image types being transformed clearly described? Where (section, paragraph #)?
13. How were anatomical locations determined, e.g., via an automated labeling algorithm (AAL), standardized coordinate database (Talairach daemon), probabilistic atlases, etc.?
14. Were any additional regressors (behavioral covariates, motion etc) used?
15. Is the contrast construction clearly defined?
16. Is a mixed/random effects or fixed inference used?
  - a. If fixed effects inference used, is this justified?
17. Were repeated measures used (multiple measurements per subject)?
  - a. If so, are the method to account for within subject correlation and the assumptions made about variance clearly stated?
18. If the threshold used for inference and visualization in figures varies, is this clearly stated?
19. Are statistical inferences corrected for multiple comparisons?
  - a. If not, is this labeled as uncorrected?
20. Are the results based on an ROI (region of interest) analysis?
  - a. If so, is the rationale clearly described?
  - b. How were the ROI's defined (functional vs anatomical localization)?
21. Is there correction for multiple comparisons within each voxel?
22. For cluster-wise significance, is the cluster-defining threshold and the corrected significance level defined?

## ▶ Additional comments

---

Additional Comments
