# Supplementary material
Source: PubMed Central journal article supplement (PMC5446786)
Supplement: NIHMS71913-supplement-Supplementary_Table_1.pdf [file NIHMS71913-supplement-Supplementary_Table_1.pdf]

| Mouse ID | Session ID | Control place cells | Delayed place cells | Silenced place cells | Sessions with pair of ensembles <sup>1</sup> | Number of PYR cells | Excluded PYR <sup>2</sup> | Control PYR cells | Delayed PYR cells | Silenced PYR cells | Number of trials |
|----------|------------|---------------------|---------------------|----------------------|----------------------------------------------|---------------------|---------------------------|-------------------|-------------------|--------------------|------------------|
| 1        | session 1  | 3                   | 0                   | 2                    |                                              | 13                  | 5                         | 6                 | 0                 | 2                  | 52               |
|          | session 2  | 5                   | 0                   | 0                    |                                              | 12                  | 4                         | 7                 | 0                 | 1                  | 49               |
| 2        | session 1  | 5                   | 0                   | 10                   | •                                            | 28                  | 3                         | 8                 | 0                 | 17                 | 54               |
|          | session 2  | 5                   | 0                   | 6                    | •                                            | 29                  | 9                         | 10                | 0                 | 10                 | 60               |
|          | session 3  | 9                   | 0                   | 16                   | •                                            | 47                  | 8                         | 9                 | 0                 | 30                 | 55               |
| 3        | session 1  | 2                   | 0                   | 0                    |                                              | 30                  | 4                         | 22                | 0                 | 4                  | 34               |
|          | session 2  | 6                   | 2                   | 0                    |                                              | 35                  | 6                         | 23                | 6                 | 0                  | 38               |
|          | session 3  | 5                   | 0                   | 5                    | •                                            | 31                  | 1                         | 18                | 0                 | 12                 | 45               |
|          | session 4  | 2                   | 3                   | 0                    |                                              | 22                  | 5                         | 5                 | 12                | 0                  | 60               |
|          | session 5  | 2                   | 0                   | 0                    |                                              | 21                  | 3                         | 18                | 0                 | 0                  | 50               |
|          | session 6  | 13                  | 0                   | 8                    | •                                            | 38                  | 3                         | 23                | 0                 | 12                 | 56               |
| 4        | session 1  | 18                  | 0                   | 13                   | •                                            | 41                  | 1                         | 25                | 0                 | 15                 | 50               |
|          | session 2  | 28                  | 0                   | 13                   | •                                            | 59                  | 7                         | 33                | 0                 | 19                 | 48               |
|          | session 3  | 18                  | 11                  | 0                    | •                                            | 44                  | 6                         | 23                | 15                | 0                  | 51               |
|          | session 4  | 5                   | 0                   | 0                    |                                              | 44                  | 4                         | 35                | 4                 | 1                  | 41               |
|          | session 5  | 26                  | 2                   | 6                    | •                                            | 50                  | 9                         | 30                | 3                 | 8                  | 49               |
|          | session 6  | 20                  | 0                   | 6                    | •                                            | 45                  | 6                         | 24                | 0                 | 15                 | 50               |
|          | session 7  | 26                  | 13                  | 0                    | •                                            | 51                  | 8                         | 29                | 14                | 0                  | 51               |
|          | session 8  | 6                   | 6                   | 3                    | •                                            | 33                  | 4                         | 12                | 11                | 6                  | 50               |
|          | session 9  | 11                  | 2                   | 5                    | •                                            | 31                  | 4                         | 15                | 3                 | 9                  | 50               |
| 5        | session 1  | 0                   | 1                   | 8                    |                                              | 14                  | 2                         | 1                 | 2                 | 9                  | 36               |
|          | session 2  | 6                   | 4                   | 6                    | •                                            | 23                  | 1                         | 7                 | 5                 | 10                 | 42               |
|          | session 3  | 10                  | 0                   | 16                   | •                                            | 54                  | 11                        | 15                | 0                 | 28                 | 29               |
|          | session 4  | 12                  | 22                  | 0                    | •                                            | 55                  | 13                        | 13                | 29                | 0                  | 42               |
|          | session 5  | 13                  | 0                   | 7                    | •                                            | 35                  | 8                         | 16                | 0                 | 11                 | 43               |
|          | session 6  | 8                   | 6                   | 0                    | •                                            | 22                  | 2                         | 11                | 9                 | 0                  | 45               |
|          | session 7  | 7                   | 0                   | 23                   | •                                            | 47                  | 8                         | 7                 | 0                 | 32                 | 50               |
|          | session 8  | 5                   | 9                   | 0                    | •                                            | 24                  | 1                         | 7                 | 16                | 0                  | 46               |
|          | session 9  | 7                   | 0                   | 14                   | •                                            | 42                  | 12                        | 8                 | 0                 | 22                 | 46               |
| Total    |            | 283                 | 81                  | 167                  |                                              | 1020                | 158                       | 460               | 129               | 273                | 1372             |

**Supplementary Table 1:** Summary of the number of place cells from each group recorded in each session and number of learning trials. Highlighted in color boxes are the sessions used for population vector analysis of Figure 5 (at least 5 place cells simultaneously recorded).

<sup>1</sup> Sessions used for population vector analysis of simultaneously recorded ensembles (see Fig. 6)

<sup>2</sup> Excluded because of undefined light response, because the cell showed increased firing during light pulses, or because it was located on the illuminated shank but not modulated by light (excluded control cell; see online Methods)
